# Supplementary material
Source: Springer Nature journal article supplement (https://www.springermedizin.de/resource/supplementary/12968_2013_3320_MOESM1_ESM.pdf/9583620)

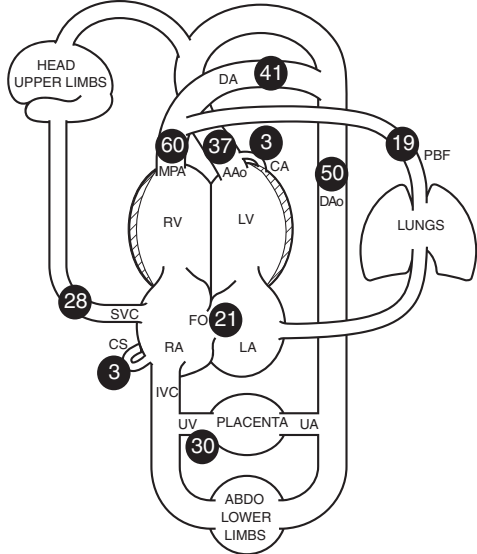

Group 1  
Normal

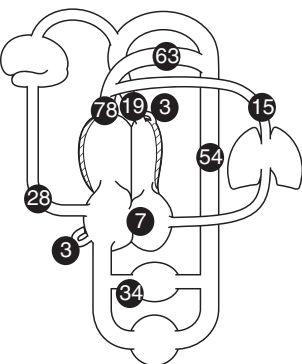

Group 2  
AS/CoA

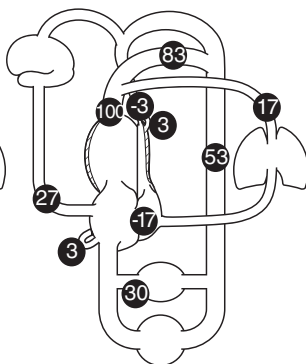

Group 3  
HLHS UAS

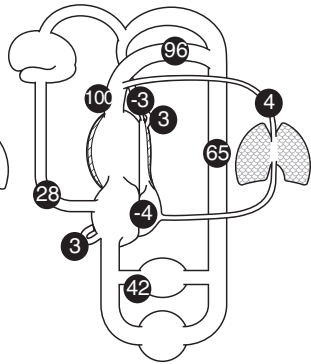

Group 4  
HLHS I/RAS

Supplement: MOESM1 [file 9583620]
